# Supplementary material for: Fabrication of multi-level carbon nanotube arrays with adjustable patterns
Source: Royal Society of Chemistry journal article supplement (doi:10.1039/c1nr11191d), 2011-11-14
Supplement: c1nr11191d1.pdf [file c1nr11191d1.pdf]

This supporting information, uploaded on 29<sup>th</sup> June 2017, replaces the version  
published on 14<sup>th</sup> November 2011

### Supporting Information

#### **Formation of hierarchical carbon nanotube arrays with adjustable patterns**

By Jianliang Gong, Lichao Sun, Yawen Zhong, Chunyin Ma, Lei Li\*, Suyuan Xie,  
Vladimir Svrcek

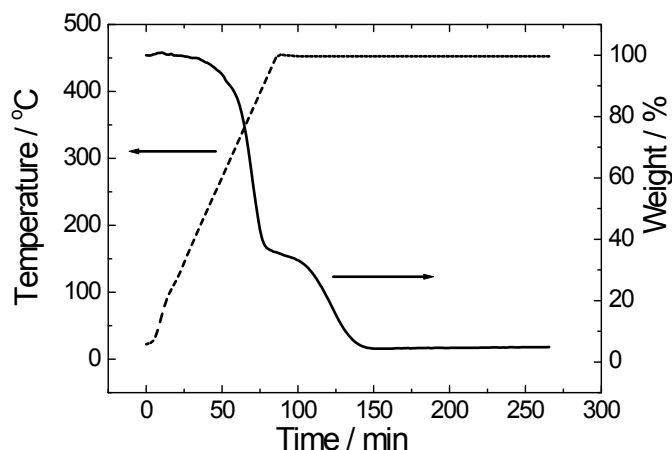

**Fig. S1** Thermogravimetric analysis of the cross-linked PSPAA after 4 h ultraviolet irradiation [ref. 7b]. Reproduced with the permission of the American Chemical Society. Copyright American Chemical Society 2009.

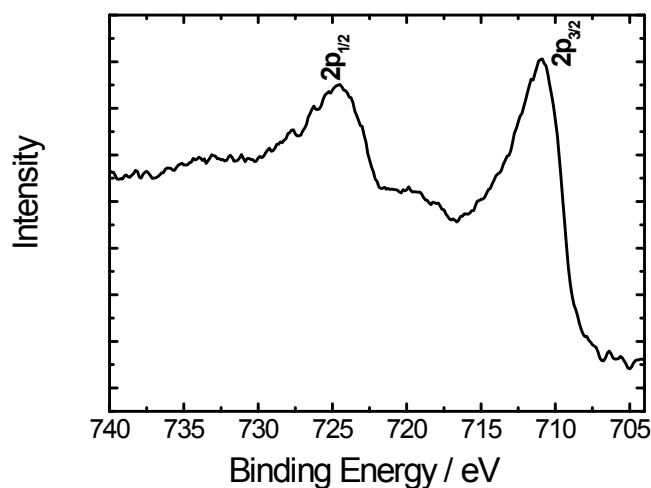

**Fig. S2** XPS core level scan of Fe after pyrolysis of the cross-linked PSPAA/ferrocene hybrid film [ref. 7b]. Reproduced with the permission of the American Chemical Society. Copyright American Chemical Society 2009.

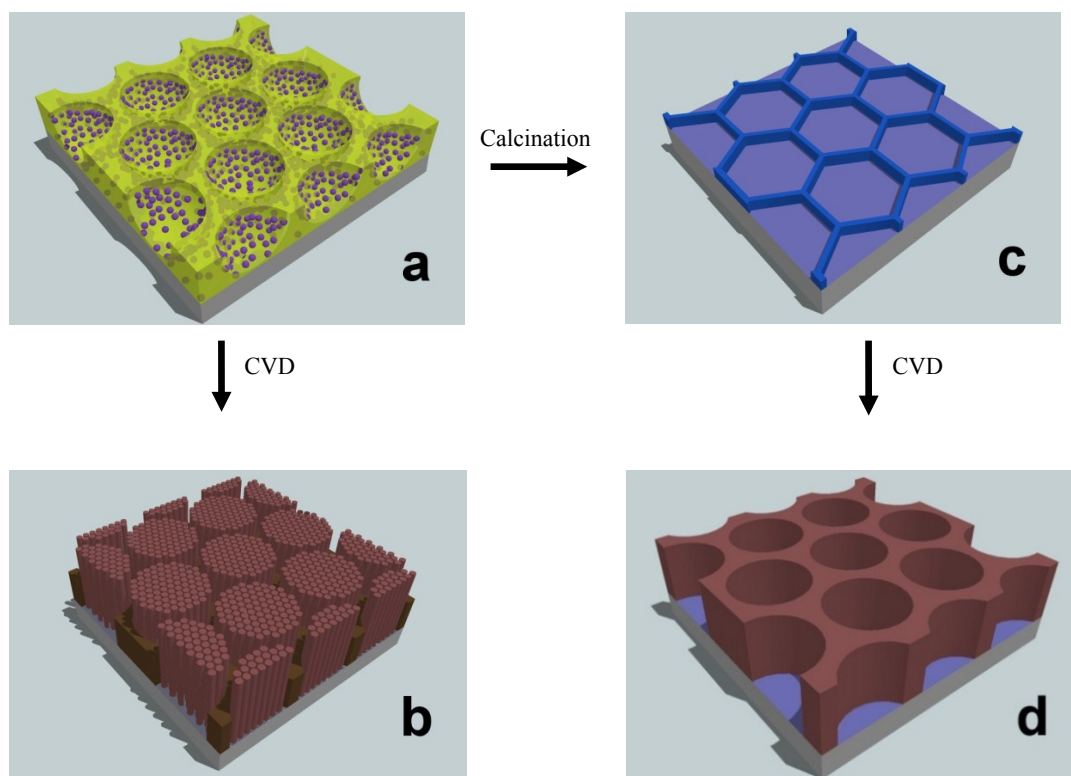

**Fig. S3** Schematic illustration of formation mechanism of vertically aligned carbon nanotube arrays with adjustable patterns on the substrate. (a) Cavities decorated by ferrocene (purple particles) in the cross-linked polymer matrix was induced by Pickering emulsion effect; (b) Isolated CNT bundles developed from the cavities template by the cross-linked microporous hybrid film; (c) Ferrous inorganic micropatterns (blue skeleton) in hexagonal shape were formed on the substrate after pyrolysis; (d) Dense CNT arrays were initiated to grow under the guidance of inorganic micropatterns.
